# Supplementary material
Source: publisher site journal article supplement (https://www.degruyterbrill.com/publication/journal_key/ZGRE/downloadAsset/ZGRE_Jahresregister%20ZGR_2016.pdf)
Supplement: Supplementary file 1 [file ZGRE_Jahresregister%20ZGR_2016.pdf]

**DE GRUYTER**

**2016 · BAND 45**

ISSN 0340-2479 · e-ISSN 1612-7048

# **ZEITSCHRIFT FÜR UNTERNEHMENS- UND GESELLSCHAFTSRECHT**

**HERAUSGEGEBEN von Alfred Bergmann, Holger Fleischer, Wulf Goette,  
Heribert Hirte, Peter Hommelhoff, Gerd Krieger, Hanno Merkt, Christoph Teichmann,  
Jochen Vetter, Marc-Philippe Weller, Hartmut Wicke**

**ZEITSCHRIFT FÜR UNTERNEHMENS- UND GESELLSCHAFTSRECHT**  
**PEER REVIEWED JOURNAL**

BEGRÜNDET VON MARCUS LUTTER UND HERBERT WIEDEMANN

**HERAUSGEBER**

Vorsitzender Richter am Bundesgerichtshof Professor Dr. Alfred Bergmann, Karlsruhe;  
Professor Dr. Dr. h.c. Holger Fleischer, LL.M., MPI Hamburg;  
Vorsitzender Richter am Bundesgerichtshof a.D. Professor Dr. Wulf Goette, Karlsruhe;  
Professor Dr. Heribert Hirte, LL.M., Universität Hamburg, MdB;  
Professor Dr. Dr. h.c. mult. Peter Hommelhoff (geschäftsführend), Universität Heidelberg;  
Rechtsanwalt Professor Dr. Gerd Krieger, Düsseldorf;  
Professor Dr. Hanno Merkt, LL.M., Universität Freiburg, Richter am OLG Karlsruhe;  
Professor Dr. Christoph Teichmann, Universität Würzburg;  
Rechtsanwalt Professor Dr. Jochen Vetter, München;  
Professor Dr. Marc-Philippe Weller, Universität Heidelberg;  
Notar Dr. Hartmut Wicke, LL.M., München

**EHEMALIGE HERAUSGEBER** Rechtsanwalt und Notar Dr. Carl Hans Barz; Präsident des BGH Dr. Robert Fischer;  
Rechtsanwalt und Wirtschaftsprüfer Dr. Dr. h.c. Reinhard Goerdeler; Professor Dr. Dr. Dr. h.c. mult. Klaus J. Hopt; Professor Dr. Dr.  
h.c. mult. Marcus Lutter; Präsident des BGH Professor Dr. Walter Odersky; Notar Professor Dr. Hans-Joachim Priester; Professor Dr.  
Herbert Wiedemann

**VERANTWORTLICHER HERAUSGEBER** Prof. Dr. Dr. h. c. mult. Peter Hommelhoff, Institut für  
Deutsches und Europäisches Gesellschafts- und Wirtschaftsrecht, Friedrich-Ebert-Platz 2, D-69117  
Heidelberg, Fax: (06221) 54 76 14, peter.hommelhoff@urz.uni-heidelberg.de

**SCHRIFTFLEITER** Professor Dr. Hanno Merkt, Institut für ausländisches und internationales Privatrecht,  
Abt. II, Albert-Ludwigs-Universität Freiburg, Peterhof - Niemensstr. 10, D-79098 Freiburg,  
E-Mail: Hanno.Merkt@jura.uni-freiburg.de

**JOURNAL MANAGER** Jana Kuchta, De Gruyter, Genthiner Straße 13, 10785 Berlin,  
Germany, Tel.: +49 (0)30 260 05-228, Fax: +49 (0)30 260 05-250,  
E-Mail: jana.kuchta@degruyter.com

**ANZEIGENVERANTWORTLICHER** Claudia Neumann, De Gruyter, Genthiner Straße 13, 10785  
Berlin, Germany, Tel.: +49 (0)30 260 05-226, Fax: +49 (0)30 260 05-264,  
E-Mail: anzeigen@degruyter.com

Die Zeitschrift und alle in ihr enthaltenen einzelnen Beiträge und Abbildungen sind urheberrechtlich geschützt. Das gilt auch für die veröffentlichten Leitsätze, denn diese sind geschützt, soweit sie vom Einsender oder von der Schriftleitung erarbeitet oder redigiert worden sind. Jede Verwertung außerhalb der engen Grenzen des Urheberrechtsgesetzes ist ohne Zustimmung des Verlages unzulässig und strafbar. Das gilt insbesondere für Vervielfältigungen, Übersetzungen, Mikroverfilmungen und die Einspeicherung und Verarbeitung in elektronischen Systemen. Fotokopien für den persönlichen und sonstigen eigenen Gebrauch dürfen nur von einzelnen Beiträgen oder Teilen daraus als Einzelkopien hergestellt werden. Jede im Bereich eines gewerblichen Unternehmens hergestellte oder benutzte Kopie dient gewerblichen Zwecken gem. § 54 (2) UrhG und verpflichtet zur Gebührenzahlung an die VG WORT, Abteilung Wissenschaft, Goethestraße 49, D-80336 München, von der die einzelnen Zahlungsmodalitäten zu erfragen sind.

ISSN 0340-2479 · e-ISSN 1612-7048

Alle Informationen zur Zeitschrift, wie Hinweise für Autoren, Open Access, Bezugsbedingungen und Bestellformulare, sind online zu finden unter [www.degruyter.com/zgr](http://www.degruyter.com/zgr)

© 2016 Walter de Gruyter GmbH, Berlin/Boston

**SATZ** Jürgen Ullrich typesatz, Nördlingen

**DRUCK** Franz X. Stickle Druck und Verlag e.K., Ettenheim  
Printed in Germany

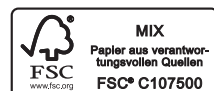

# Inhaltsverzeichnis

|                                                                                                                                                                                                         |     |
|---------------------------------------------------------------------------------------------------------------------------------------------------------------------------------------------------------|-----|
| ANGERER, LUTZ: Aufhebung eines Unternehmensvertrags mit einer abhängigen GmbH – Besprechung der Entscheidung BGHZ 206, 74                                                                               | 609 |
| BAYER, WALTER/SCHOLZ, PHILIPP: Zweifelsfragen der gesamtschuldnerischen Organhaftung im Aktienrecht . . . . .                                                                                           | 619 |
| BINDER, JENS-HINRICH: Zivilrechtliche und strafrechtliche Aufarbeitung der Finanzmarktkrise . . . . .                                                                                                   | 229 |
| DREHER, MEINRAD/HOFFMANN, JENS: Die Wirksamkeitsprüfung durch den Prüfungsausschuss nach § 107 Abs.3 Satz 2 AktG – Internes Kontrollsystem, Risikomanagementsystem und Governancesystem                 | 445 |
| DUTTA, ANATOL: Das Pooling von Kapitalgesellschaftsanteilen im inhabergeführten Unternehmen . . . . .                                                                                                   | 581 |
| FLEISCHER, HOLGER: Die geschlossene Kapitalgesellschaft im Rechtsvergleich – Vorüberlegungen zu einer internationalen Entwicklungs- und Ideengeschichte . . . . .                                       | 36  |
| FOERSTER, MAX/HABERSACK, MATHIAS: Debitorische Konten und Massezuflüsse im Recht der Zahlungsverbote – Besprechung der Entscheidungen BGH II ZR 100/13, BGH II ZR 231/13 und BGH II ZR 366/13 . . . . . | 153 |
| FREITAG, ROBERT/FÜRBASS, JAN: Wann ist ein Fonds eine Investmentgesellschaft? . . . . .                                                                                                                 | 729 |
| FÜRBASS, JAN/FREITAG, ROBERT: Wann ist ein Fonds eine Investmentgesellschaft? . . . . .                                                                                                                 | 729 |
| HABERSACK, MATHIAS/FOERSTER, MAX: Debitorische Konten und Massezuflüsse im Recht der Zahlungsverbote – Besprechung der Entscheidungen BGH II ZR 100/13, BGH II ZR 231/13 und BGH II ZR 366/13 . . . . . | 153 |
| HARBARTH, STEPHAN: Zum Reformbedarf im GmbH-Recht: Generalrevision oder punktuelle Fortentwicklung? . . . . .                                                                                           | 84  |
| HOFFMANN, JENS/DREHER, MEINRAD: Die Wirksamkeitsprüfung durch den Prüfungsausschuss nach § 107 Abs.3 Satz 2 AktG – Internes Kontrollsystem, Risikomanagementsystem und Governancesystem                 | 445 |
| HÖPFNER, CLEMENS: Der fehlerhafte Aufsichtsrat – Zur Anwendbarkeit der Lehre vom fehlerhaft bestellten Organ auf die Beschlussfassung im Aufsichtsrat . . . . .                                         | 505 |
| HÜBNER, LEONHARD: Organhaftung, EuGVO und Rom I-VO – Zugleich Besprechung der Entscheidung EuGH NZG 2015, 1199 ff                                                                                       | 897 |
| KLÖHN, LARS/SCHMOLKE, HANS ULRICH: Der Aufschub der Ad-hoc-Publizität nach Art.17 Abs.4 MAR zum Schutz der Unternehmensreputation . . . . .                                                             | 866 |
| KLUSMANN, MARTIN: Sanktionsrisiken im Kartellrecht . . . . .                                                                                                                                            | 252 |
| KÖTH, CHRISTOPHER: Die Verwertbarkeit von Sicherheiten für Gesellschafterdarlehen in der Insolvenz . . . . .                                                                                            | 541 |

|                                                                                                                                                                    |     |
|--------------------------------------------------------------------------------------------------------------------------------------------------------------------|-----|
| KRAUSE DANIEL M.: Unternehmen und Organmitglieder im Strafverfahren . . . . .                                                                                      | 335 |
| KUMPAN, CHRISTOPH: Die Europäische Kapitalmarktunion und ihr Fokus auf kleinere und mittlere Unternehmen . . . . .                                                 | 2   |
| LIEDER, JAN: Ausfallhaftung und Anteilsübertragung . . . . .                                                                                                       | 760 |
| MERKT, HANNO: Geschäftsleiter zwischen Zivil- und Strafrecht: Die Perspektive des Gesellschafts- und Kapitalmarktrechts . . . . .                                  | 201 |
| PERRON, WALTER: Geschäftsleiter zwischen Zivil- und Strafrecht: Die strafrechtliche Perspektive unter besonderer Berücksichtigung des Untreuetatbestands . . . . . | 187 |
| RAISER, THOMAS: Allgemeine Vorschriften über juristische Personen in einem künftigen Bürgerlichen Gesetzbuch . . . . .                                             | 781 |
| RÖNNAU, THOMAS: Haftung für unterlassene Aufsicht nach § 130 OWiG und strafrechtlicher (Drittempfänger-)Verfall gemäß § 73 Abs. 3 StGB . . . . .                   | 277 |
| SCHMOLKE, HANS ULRICH/KLÖHN, LARS: Der Aufschub der Ad-hoc-Publizität nach Art. 17 Abs. 4 MAR zum Schutz der Unternehmensreputation . . . . .                      | 866 |
| SCHOLZ, PHILIPP/BAYER, WALTER: Zweifelsfragen der gesamtschuldnerischen Organhaftung im Aktienrecht . . . . .                                                      | 619 |
| THOMALE, CHRIS/WALTER, ANDREAS: Delisting als Regulierungsaufgabe . . . . .                                                                                        | 679 |
| VEIL, RÜDIGER: Sanktionsrisiken für Emittenten und Geschäftsleiter im Kapitalmarktrecht . . . . .                                                                  | 305 |
| VON HEIN, JAN: USA: Punitive Damages für unternehmerische Menschenrechtsverletzungen . . . . .                                                                     | 414 |
| WAGNER, GERHARD: Sinn und Unsinn der Unternehmensstrafe – Mehr Prävention durch Kriminalisierung? . . . . .                                                        | 112 |
| WALTER, ANDREAS/THOMALE, CHRIS: Delisting als Regulierungsaufgabe . . . . .                                                                                        | 679 |
| WEDEMANN, FRAUKE: Ist der Nießbraucher eines Gesellschaftsanteils wie ein Gesellschafter zu behandeln? . . . . .                                                   | 798 |
| WELLER, MARC-PHILIPPE: Wissenszurechnung in internationalen Unternehmensstrafverfahren . . . . .                                                                   | 384 |
| WITSCHEN, STEFAN: Neuverhandlung der Arbeitnehmerbeteiligung nach Gründung einer SE . . . . .                                                                      | 644 |
| WOHLERS, WOLFGANG: Der Gesetzesentwurf zur strafrechtlichen Verantwortlichkeit von Unternehmen und sonstigen Verbänden . . . .                                     | 364 |
| ZIEMONS, HILDEGARD: Rechtsanwälte im Aufsichtsrat – im Dickicht von Berufsrecht, Aktienrecht und Corporate Governance Kodex .                                      | 839 |

# Sachregister

- Abberufung von Vorstandsmitgliedern** 528 f
- Abschottung des Mitgliederbestands** 591 f,  
595 ff
- Abspaltungsverbot** 818 f
- abzuschöpfendes Etwas** 299 ff
- Ad-hoc-Publizität** 866 ff
  - Aktionärsinteresse 874 ff
  - Aufschub 869 ff
  - befangener Vorstand 886 ff
  - Bekanntheit 871
  - Beurteilungsspielraum 886 f
  - Compliance-Verstoß 882 f
  - Drittinteressen 888 f
  - Emittenteninteresse 873 ff
  - Haftungsrisiken 887 f
  - Handelnder 870
  - Konzerninteressen 888 f
  - Kosten 877 ff
  - Missmanagement 882 f
  - Mitwirkungsverbot 890 f
  - Nutzen 880 ff
  - Prognoseentscheidung 884 ff
  - Reputationsverlust 871 f
  - rufschädigende Handlungen 871
  - shareholder value 875
  - Sonderinteresse des Vorstands 887 ff
  - stakeholder value 875
  - überbewertetes Eigenkapital 881 f
  - Überreaktion des Marktes 878 ff
  - Zusatzrendite 879 f
- Aktienregister** 812, 835 f
- Alien Tort Statute**
  - Menschenrechtsverletzungen 416 f
  - punitive damages für unternehmerische Menschenrechtsverletzungen 416 f
- Anfechtung** 554 ff
- Anlegerschutz** 15 f
- Anstellungsverhältnis** 907 f
- Anteilsübertragung** 760 ff
- anwendbares Recht**
  - Menschenrechtsverletzungen 433, 434 f
  - punitive damages für unternehmerische Menschenrechtsverletzungen 433, 434 f
- Arbeitnehmer**
  - Europäische Aktiengesellschaft 644 ff
  - Organhaftung 621 ff, 901 ff
- Arrest**
  - Organmitglieder im Strafverfahren 352 ff
  - Unternehmen im Strafverfahren 352 ff
- Aufhebung eines Unternehmensvertrages** 609 ff
- Aufklärungspflicht** 757 f
- Aufsichtspflichtverletzung** 277 ff
  - Bußgeldandrohung 286 ff
  - Charakter 280 ff
  - Compliance 293 f
  - faktische Betrachtungsweise 290
  - Funktion 280 ff
  - Geschäftsleiter (s dort)
  - Normzweck 292
  - Rechtsfolgen 286 ff
  - Sanktionendurchgriff 289 ff
  - Sanktionsvoraussetzungen 283 ff
  - Sonderdelikt 283
  - Unternehmensverbund 289 ff
  - Verfahrensrecht 286 ff
  - Voraussetzungen 283 ff
  - Zurechnungszusammenhang 285
- Aufsichtsrat**
  - fehlerhafter Aufsichtsrat (s dort)
  - Geschäftsleiter 211 f
  - Organhaftung (s dort)
  - Organmitglieder im Strafverfahren 339 f
  - Prüfungsausschuss 457 ff
  - Rechtsanwalt 844 ff, 846 ff
  - Unternehmen im Strafverfahren 339 f
  - Unternehmensstrafe 118 ff
- Aufspaltung** 802 f
- Aufzeichnungspflichten** 321 f
- Ausfallhaftung** 760 ff
  - Einlageschuld 764 f
  - Erwerberhaftung 771 f
  - Fälligkeit der Einlageschuld 764 f
  - Gesellschafterliste 774 f
  - Gläubigerschutz 766, 778
  - Grundlagen 763 f
  - Kapitalschutz 766, 778
  - MoMiG 777 f
  - Nichtigkeit der Anteilsübertragung 773 f
  - Rechtsmissbrauch 772 f
  - Reform 777
  - Weiterveräußerung 768 f
  - Zeitpunkt 764 ff
  - Zweck 770 f
- Auskunftsrecht der Aktionäre** 850 ff
- Außenhaftung** 806 f, 828 ff
- Auszahlungssperre** 561
- Balkaya-Entscheidung** 902 ff
- Bankenunion** 5 f
- Bargeschäft** 180 ff, 565 f

**Beratung**

- Kapitalmarktunion 23 ff
- kleinere und mittlere Unternehmen (s dort)

**Beschlagnahme**

- Organmitglieder im Strafverfahren 349 ff
- Unternehmen im Strafverfahren 349 ff

**Beschuldigter**

- Organmitglieder im Strafverfahren 336 ff
- Unternehmen im Strafverfahren 336 ff

**Bestandsgefährdung** 234 f**Bestätigungsbeschluss** 530 f**Bestellung** 512, 907 f**Beteiligungsvereinbarung** 658 ff, 658 ff**Betriebswirtschaft** 452 ff, 492 ff**Beurkundung** 109 f**Binnenorganisation** 75**Blockwahl** 534 ff**Bruttoprinzip**

- Organmitglieder im Strafverfahren 353
- Unternehmen im Strafverfahren 353

**Bußgeld**

- Aufsichtspflichtverletzung 286 ff
- Kartellbußgelder 265 ff
- Organmitglieder im Strafverfahren 359 f
- Unternehmen im Strafverfahren 359 f

**Common Law**

- Menschenrechtsverletzungen 430 ff
- punitive damages für unternehmerische Menschenrechtsverletzungen 430 ff

**Compliance**

- Ad-hoc-Publizität 882 f
- Aufsichtspflichtverletzung 293 f
- internes Kontrollsystem 475 ff
- Kapitalmarktrecht 327 f
- strafrechtliche Verantwortlichkeit von Unternehmen 366 ff

**Crowdfunding** 32 ff**Danosa-Entscheidung** 902 ff**Datumtheorie** 407 ff**DCGK** 844 ff**debitorische Konten** 163 ff, 173 ff**Deliktsgerichtsstand** 912 f**Delisting** 679 ff

- Downlisting 709 ff
- Empirie 700 ff
- Frankreich 696
- Frosta-Entscheidung 688 f
- historische Entwicklung 684 ff
- irreguläre Delistings 717
- Macrotron-Entscheidung 686 ff
- Minderheitsaktionäre 698 ff
- Motive 696 ff
- Rechtsvergleich 694 ff
- Schutzbedürfnis 698 ff

- US-amerikanisches Recht 694 f

- Vereinigtes Königreich 695

- Verfassungsrecht 686 ff

**Doppelqualifikation** 908 f**Downlisting** 709 ff**Drittempfängerverfall** 297**EADS/Daimler-Entscheidung** 385 f**eigenkapitalersetzende Darlehen** 544 ff**Einheitsgesellschaft** 60 f**Einlageschuld** 764 f**Entlastung** 851**Entsprechenserklärung** 844 ff**Erbschaftssteuerrecht** 584 ff**Ersatzbestellung** 531**Erwerberhaftung** 771 f**EuGVO** 901 ff**Europäische Aktiengesellschaft**

- Arbeitnehmer 644 ff
- Beteiligungsvereinbarung 658 ff
- gewillkürte Neuverhandlungen 659 ff
- Gründung 644 ff
- Mitbestimmung 644 ff
- Neuverhandlungen 649 ff
- Scheitern der Neuverhandlungen 671 ff
- Verhandlungen 648 ff

**Existenzbedrohung** 214 f**faktisches Organ**

- fehlerhafter Aufsichtsrat 509 ff
  - Geschäftsleiter 210
  - Organmitglieder im Strafverfahren 337
  - Unternehmen im Strafverfahren 337
- Familienpool** 588
- Familienstammpool** 589
- fehlerhafter Aufsichtsrat** 505 ff
- Abberufung von Vorstandsmitgliedern 528 f
  - Ablauf der Amtszeit 512 f
  - aufschiebend bedingte Ersatzbestellung 532 f
  - Außenverhältnis 513 ff
  - Beschlüsse 520 ff
  - Bestätigungsbeschluss 530 f
  - Bestellung 512
  - Blockwahl 534 ff
  - Einzelwahl 534 ff
  - Ersatzbestellung 531
  - faktisches Organ 509 ff
  - Feststellung des Jahresabschlusses 524 f
  - Folgebeschlüsse 522 ff
  - Geschlechterquote 533 ff
  - Heilung 530 ff
  - Innenverhältnis 518 f
  - Mitbestimmung 522
  - quotenwidrig besetzter Aufsichtsrat 537 f

- Unwirksamkeit der Beschlüsse 520 ff
- Vergütung 515 ff
- Vertretung 512 f, 525 ff
- Vorsorge 530

**Ferho-Entscheidung** 904 ff**Feststellung des Jahresabschlusses** 524 f**Fiktionstheorie** 124 f**Finanzkrise** 229 ff

- Aufarbeitung 242 ff
- Bestandsgefährdung 234 f
- Fallmaterial 236 ff
- Geschäftsleiter (s dort)
- HSH-Nordbank 239 ff
- IKB 236 ff
- Individualversagen 244 ff
- Marktversagen 246 ff
- Staatsversagen 249 ff
- zivilrechtliche Aufarbeitung 229 ff

**Folgebeschlüsse** 522 ff**Fonds** 729 ff

- Aufklärungspflicht 757 f
- aufsichtsrechtliche Kontrolle 737
- Investmentaktiengesellschaft 738
- Investmentgesellschaft 735 ff
- Investmentkommanditgesellschaft 738 ff
- privatrechtliche Kontrolle 737
- Prospekthaftung 750 ff
- Registergericht 737
- Schutzgesetzhaftung 753 ff
- Spezialfonds 744 f
- Typenzwang 733 ff
- unzulässiges Rechtskleid 745 ff

**forum non conveniens**

- Menschenrechtsverletzungen 427 ff
- punitive damages für unternehmerische Menschenrechtsverletzungen 427 ff

**Frankreich**

- Delisting 696
- geschlossene Kapitalgesellschaft 46 ff, 66 ff
- Gesellschaftsanteil 814 ff

**Freistellungszusage** 637 ff**Frosta-Entscheidung** 688 f**Garantenstellung**

- Organmitglieder im Strafverfahren 338 f
- Unternehmen im Strafverfahren 338 f

**Gefährdungsschaden** 197 ff**Gehilfen**

- Menschenrechtsverletzungen 431 f
- punitive damages für unternehmerische Menschenrechtsverletzungen 431 f

**Gerichtsstand** 897 ff**Gesamtschuld** 619 ff**Geschäftsfähigkeit** 788 ff**Geschäftsführungsbefugnis** 804 f, 826 f**Geschäftsleiter**

- Aufsichtspflichtverletzung (s dort)
- Aufsichtsrat 211 f
- Durchsetzung von Sanktionen 215 ff
- Existenzbedrohung 214 f
- faktisches Organ 210
- Geldstrafe 212 f
- Gläubigerschutz 209 ff
- Kapitalmarktrecht 305 ff
- Kollegialorgan 210 f
- Konkurrenzlehre 218 f
- Organmitglieder im Strafverfahren 337
- privates Enforcement 215 f
- Prüfungsausschuss 211 f
- public Enforcement 216 f
- Ressortzuständigkeit 210 f
- Sanktionierung 201 ff
- Schadenersatz 212 f
- Schutzgesetzhaftung 206 f
- Sorgfaltspflicht 207 f
- Unternehmen im Strafverfahren 337
- Untreue (s dort)
- Vermögensabschöpfung (s dort)
- Versicherbarkeit 213 f

**Geschlechterquote** 533 ff**geschlossene Kapitalgesellschaft** 36 ff

- Autonomiemodell 61 f
- Binnenorganisation 75
- Deutschland 40 ff
- Einheitsgesellschaft 60 f
- Entstehungsgründe 53 f
- Faktizität 58
- Flexibilität 73
- Frankreich 46 ff, 66 ff
- Gegenwart 59 ff
- Genese 38 ff
- Gerichte 56
- Gestaltungsfreiheit 73 ff
- Ideenzirkulation 56 f
- Impulsgeber 54 ff
- Integrationsmodell 62 f
- Mitgliedschaft 75 ff
- Rechtsformneuschöpfungen 65 ff
- Rechtsformvariationen 65 ff
- Rechtsvergleich 53 ff
- Reform 59
- Treuepflicht 77 ff
- Unternehmersgesellschaft 68 ff
- Vereinigte Staaten von Amerika 49 ff, 66 ff
- Vereinigtes Königreich 42 ff
- Vertragsfreiheit 74 f

**Gesellschaft bürgerlichen Rechts** 796

**Gesellschafterdarlehen** 809 ff, 833 f

**Gesellschafterliste**

- Ausfallhaftung 774 f
- Gesellschaftsanteil 812 f, 836 f

**Gesellschaftsanteil**

- Abspaltungsverbot 818 f
- Aktienregister 812, 835 f
- allgemeines Stimmrecht 801
- Aufspaltung 802 f
- Außenhaftung 806 f, 828 ff
- Frankreich 814 ff
- Geschäftsführungsbefugnis 804 f, 826 f
- Gesellschafterdarlehen 809 ff, 833 f
- Gesellschafterliste 812 f, 836 f
- Grundbuch 813, 837
- Handelsregister 811, 834 f
- Insolvenzantrag 809, 831 ff
- Kapitalerhaltung 807 ff, 830 f
- Nießbrauch (s dort)
- organschaftliche Geschäftsführung 804 f, 826 f
- organschaftliche Vertretung 804 f, 826 f
- Register 834 ff
- Stimmrecht 800 ff, 823 ff
- Treuepflicht 805 f, 827 f
- Vergemeinschaftung 803 f
- Vertretungsbefugnis 804 f, 826 f

**Gesellschaftsinteresse** 856 ff, 859 f

**Gesellschaftsstatut** 396 ff

**Gesellschaftsvermögen** 191 ff

**Gesellschaftsvertrag** 592 f

**Gestaltungsfreiheit** 73 ff

**gestörte Gesamtschuld** 625 ff

**Gewerbezentralregister**

- Organmitglieder im Strafverfahren 360
- Unternehmen im Strafverfahren 360

**Gläubigerschutz**

- Ausfallhaftung 766, 778
- Geschäftsleiter 209 ff

**GmbH** 84 ff

- Europäisierung 93 ff
- geschlossene Kapitalgesellschaft (s dort)
- Organhaftung 901 f
- Radikalreform 95 ff
- Reform 84 ff
- Unternehmergesellschaft (s dort)
- Vereinigtes Königreich 88 ff
- volkswirtschaftlicher Nutzen 92 f
- Wettbewerb der Rechtsformen 88 ff

**Governance-System** 465 ff

**Grundbuch** 813, 837

**Gründerpool** 588

**Grundrechte** 786

**Grundstruktur** 295 f

**Gründung**

- Europäische Aktiengesellschaft 644 ff
- Juristische Person 792

**Gründungstheorie** 399

**Haftungsbeschränkung** 787 f

**Haftungsprivileg** 621 ff

**Handelsregister** 811, 834 f

**Heilung** 530 ff

**Holding** 602 ff

**HSH-Nordbank** 239 ff

**IDW-Prüfungsstandards** 452 ff, 492 ff

**IKB** 236 ff

**Immunität**

- Menschenrechtsverletzungen 429 f
- punitive damages für unternehmerische Menschenrechtsverletzungen 429 f

**Informationen**

- Kapitalmarktrecht 324 ff
- kleinere und mittlere Unternehmen 22 f
- Rechtsanwalt 855 f

**Innengesellschaft** 593 ff

**Insolvenzantrag** 160 ff, 809, 831 ff

**Interessenkonflikte** 852 ff

**Internationales Gesellschaftsrecht** 387 ff, 392 f, 407 ff

**Internationales Privatrecht** 905 f

**internationales Strafrecht** 391 f

**interne Haftungsverteilung** 623 ff

**interner Kontrollrahmen** 481 f

**internes Informationssystem** 480 f

**internes Kontrollsystem** 471 ff

- Begriff 471 ff
- Compliance 475 ff
- interne Informationssystem 480 f
- interner Kontrollrahmen 481 f
- IRS 473 ff
- Mittel 471 ff
- Organisation 471 ff
- Ziel 471 ff

**Investmentaktiengesellschaft** 738

**Investmentgesellschaft** 735 ff

**Investmentkommanditgesellschaft** 738 ff

**irreguläre Delistings** 717

**IRS** 473 ff

**Juristische Person** 781 ff

- Begriff 785 ff
- Geschäftsfähigkeit 788 ff
- Gesellschaft bürgerlichen Rechts 796
- Grundrechte 786
- Gründung 792
- Haftungsbeschränkung 787 f
- Kommanditgesellschaft 795
- Konzern 788
- Mitgliederversammlung 790 f



- nicht eingetragene Vereine 796 f
- offene Handelsgesellschaft 795
- Organmitglieder im Strafverfahren 341
- Personengesellschaften 795
- rechtliche Anerkennung 792 f
- Stimmverbot 791 f
- Unternehmen im Strafverfahren 341
- Vorgesellschaft 793 ff
- Zurechnung 789
- Kapitalerhaltung** 807 ff, 830 f
- Kapitalmarktrecht** 305 ff
  - Aufzeichnungspflichten 321 f
  - Compliance 327 f
  - einfache Fahrlässigkeit 309 ff
  - Geschäftsleiter 305 ff
  - Informationszugang 324 ff
  - konzernumsatzbezogene Geldbußen 313 ff
  - Leichtfertigkeit 309 ff
  - öffentliche Bekanntmachung 318 f
  - öffentlich-rechtliches Sanktionenregime 307 ff
  - privatrechtliche Ansprüche 322 ff
  - Rechtssicherheit 325 ff
  - Sanktionsrahmen 313
  - Transparenzregeln 322
  - umsatzbezogene Geldbußen 313 ff
  - Verschulden 309 ff
  - whistleblowing 320 f
- Kapitalmarktunion** 2 ff
  - Aktionsplan 4 ff
  - Anlegerschutz 15 f
  - Bankenunion 5 f
  - Beratung 23 ff
  - Crowdfunding 32 ff
  - Instrumente 16 ff
  - kleinere und mittlere Unternehmen (s dort)
  - Kritik 8 ff
  - multilaterale Handelssysteme 19 f
  - ökonomischer Hintergrund 6 ff
  - Privatplatzierungen 32 ff
  - Prospektpflicht 17 ff
  - Qualitätssignale 27 ff
  - Regulierungsinstrumente 16 ff
  - Regulierungsziele 13 ff
  - Schuldscheindarlehen 26 f
  - Standardisierung 26 f
  - Transparenz 16 ff
  - Unternehmensschutz 13 f
  - Verbriefungen 27 ff
  - Ziele 5
- Kapitalschutz** 766, 778
- Kartellbußgelder** 252 ff
  - Bußgeldrahmen 265 ff
  - deutsches Kartellrecht 257
  - europäisches Kartellrecht 255 ff
  - Kappungsgrenze 265 ff
  - Rahmentheorie 268 f
  - reformatio in peius 268 f
  - Tochtergesellschaft 260 f
  - wirtschaftliche Einheit 254 ff
- Kiobel-Entscheidung**
  - Menschenrechtsverletzungen 418 ff
  - punitive damages für unternehmerische Menschenrechtsverletzungen 418 ff
- kleinere und mittlere Unternehmen** 11 ff
  - Begriff 11 f
  - Beratung 23 ff
  - Förderungsbedürftigkeit 14 f
  - Informationen 22 f
  - Prospekt 20 ff
  - Schuldscheindarlehen 26 f
  - Schutzbedürftigkeit 14 f
  - Wachstumsmärkte 30 ff
  - zentrale Anlaufstelle 25 f
- Knowledge Governance** 409 ff
- Kommanditgesellschaft** 795
- Konzern**
  - Ad-hoc-Publizität 888 f
  - Juristische Person 788
  - Kapitalmarktrecht 313 ff
- Korruptionsregister**
  - Organmitglieder im Strafverfahren 360 f
  - Unternehmen im Strafverfahren 360 f
- Kündigung** 614 f
- Leichtfertigkeit** 309 ff
- lex minor** 398
- Liechtenstein** 373 ff
- Longarm Statutes**
  - Menschenrechtsverletzungen 433
  - punitive damages für unternehmerische Menschenrechtsverletzungen 433
- Macrotron-Entscheidung** 686 ff
- Mandanteninteressen** 856 ff
- Mandate von Aktionären** 860 f
- Marktmissbrauchsverordnung** s Kapitalmarktrecht
- Marktversagen** 246 ff
- Masseschmälerungen** 169 ff
- Menschenrechtsverletzungen** 415 ff
  - Abwehrmöglichkeiten 435 ff
  - Alien Tort Statute 416 f
  - Anerkennung 436
  - anwendbares Recht 433, 434 f
  - Common Law 430 ff
  - forum non conveniens 427 ff
  - Gehilfen 431 f
  - Immunität 429 f

- Kiobel-Entscheidung 418 ff
- Longarm Statutes 433
- political questions doctrine 429
- Teilnehmer 431 f
- Touch and Concern 420 ff
- Vereinigte Staaten von Amerika 416 f
- Völkerrecht 430 ff
- Vollstreckung 436
- Zuständigkeit 434 ff
- Zustellung 435 f
- Minderheitsaktionäre** 698 ff
- Mitarbeiterdelikte** 141
- Mitbestimmung**
  - Europäische Aktiengesellschaft 644 ff
  - fehlerhafter Aufsichtsrat 522
- Mitgliederversammlung** 790 f
- Mitgliedschaft** 75 ff
- Mitverschulden** 631 f
- Mitwirkungsverbot** 890 f
- MoMiG**
  - Ausfallhaftung 777 f
  - Sicherheiten für Gesellschafterdarlehen 544 ff, 548 ff
- multilaterale Handelssysteme** 19 f
- Nacherbschaft** 604 ff
- Nachrang** 560 ff
- nicht eingetragene Vereine** 796 f
- Nießbrauch** 798 ff
- Nominierungsgremium** 846 ff
- NRW-Gesetzesentwurf** s strafrechtliche Verantwortlichkeit von Unternehmen
- offene Handelsgesellschaft** 795
- öffentliche Bekanntmachung** 318 f
- organakzessorische Unternehmensstrafbarkeit** 389 f
- Organhaftung** 619 ff, 897 ff
  - Anspruchskürzung 625 ff
  - Anstellungsverhältnis 907 f
  - Arbeitnehmer 621 ff, 901 ff
  - Balkaya-Entscheidung 902 ff
  - Bestellungsverhältnis 907 f
  - Danosa-Entscheidung 902 ff
  - Deliktsgerichtsstand 912 f
  - Doppelqualifikation 908 f
  - EuGVO 901 ff
  - Ferho-Entscheidung 904 ff
  - Freistellungszusage 637 ff
  - Gerichtsstand 897 ff
  - Gesamtschuld 619 ff
  - gestörte Gesamtschuld 625 ff
  - GmbH-Geschäftsführer 901 f
  - Haftungsprivileg 621 ff
  - Internationales Privatrecht 905 f
  - interne Haftungsverteilung 623 ff
  - Mitverschulden 631 f
  - Rom-I-VO 906 ff
  - Vergleich 632 ff
  - Vertragsgerichtsstand 911 f
  - Verzicht 632 ff
- Organisationsstruktur**
  - internes Kontrollsystem 471 ff
  - Organmitglieder im Strafverfahren 337 f
  - Risikomanagementsystem 482 ff
  - Unternehmen im Strafverfahren 337 f
  - Unternehmensstrafe 118 ff
- Organmitglieder im Strafverfahren** 336 ff
  - Arrest 352 ff
  - Aufsichtsrat 339 f
  - außerstrafrechtliche Rechtsfolgen 356 f
  - Beschlagnahme 349 ff
  - Beschuldigter 336 ff
  - Bruttonprinzip 353
  - Bußgeld 359 f
  - Einstellung 355 f
  - faktisches Organ 337
  - Freiheitsstrafe 354 f
  - Garantenstellung 338 f
  - Geldstrafe 354 f
  - Geschäftsleiter 337
  - Gewerbezentralregister 360
  - Juristische Person 341
  - Konfrontation 347 f
  - konzertierte Verteidigung 345 ff
  - Kooperation 347 f
  - Korruptionsregister 360 f
  - Organisationsstruktur 337 f
  - Rechtsfolgen 354
  - Sockelverteidigung 345 ff
  - strafprozessuale Eingriffe 347 ff
  - Unterlassen 338 f
  - unternehmensinterne Untersuchungen 348 f
  - Verbandsgeldbuße 341 f
  - Verfallsrecht 341 f, 357 ff
  - Vergaberegister 360 f
  - Vermögenswerte 352 ff
  - Verteidigung 342 ff
  - Verteidigungsunterlagen 349 ff
  - vorläufiger Zugriff 352 ff
- organschaftliche Geschäftsführung** 804 f, 826 f
- organschaftliche Vertretung** 804 f, 826 f
- Organtheorie** 400 f
- Originalverfall** 296
- Österreich** 368 ff
- Personengesellschaften** 795
- political questions doctrine**
  - Menschenrechtsverletzungen 429

- punitive damages für unternehmerische Menschenrechtsverletzungen 429

### **Pooling von Kapitalgesellschaftsanteilen** 581 ff

- Abschottung des Mitgliederbestands 591 f, 595 ff
- Anreiz 582 ff
- autonom motivierter Pool 590 ff
- Dauerhaftigkeit 592, 600 ff
- Erbschaftssteuerrecht 584 ff
- Familienpool 588
- Familienstammpool 589
- Gesellschaftsvertrag 592 f
- Gründerpool 588
- Holding 602 ff
- Innengesellschaft 593 ff
- Motive 587 ff
- Nacherbschaft 604 ff
- schuldrechtliche Bindungen 593 f
- Selbstzweckpool 590
- Stimmrechtsbindung 591, 594 f
- Testamentsvollstreckung 604 ff
- Vorerbschaft 604 ff
- Weitergabepool 589 f

### **Porsche/Volkswagen** 387

### **Präventionswirkung** 131 ff

### **Privatplatzierungen** 32 ff

### **Prognoseentscheidung** 884 ff

### **Prospektpflicht**

- Fonds 750 ff
- Kapitalmarktunion 17 ff
- kleinere und mittlere Unternehmen 20 ff

### **Prüfungsausschuss** 445 ff

- Aufgabenübertragung 458 ff
- Aufsichtsrat 457 ff
- betriebswirtschaftliche Modelle 452 ff, 492 ff
- Durchführung der Prüfung 494 ff
- Geschäftsleiter 211 f
- Governance-System 465 ff
- IDW-Prüfungsstandards 452 ff, 492 ff
- Instrumente 495 ff
- Intensität der Aufgabenerfüllung 461 ff
- internes Kontrollsystem (s dort)
- Prüfungsgegenstand 464 ff, 487 ff
- Prüfungsstandards 452 ff
- Prüfungsziel 487 ff
- Rechtsgrundlagen 447 ff
- Risikomanagementsystem 465 ff
- Selbstorganisationsrecht 469 f
- Systempflicht 469 f
- Überwachung 494 ff

### **Prüfungsstandards** 452 ff

### **public Enforcement** 216 f

### **punitive damages für unternehmerische Menschenrechtsverletzungen** 415 ff

- Abwehrmöglichkeiten 435 ff
- Alien Tort Statute 416 f
- Anerkennung 436
- anwendbares Recht 433, 434 f
- Common Law 430 ff
- forum non conveniens 427 ff
- Gehilfen 431 f
- Immunität 429 f
- Kiobel-Entscheidung 418 ff
- Longarm Statutes 433
- political questions doctrine 429
- Teilnehmer 431 f
- Touch and Concern 420 ff
- Vereinigte Staaten von Amerika 416 f
- Völkerrecht 430 ff
- Vollstreckung 436
- Zuständigkeit 434 ff
- Zustellung 435 f

### **Qualifikation** 399

### **quotenwidrig besetzter Aufsichtsrat** 537 f

### **Rahmentheorie** 268 f

### **Rechtsanwalt** 839 ff

- Aktienrecht 843 f
- aktienrechtliche Verschwiegenheitspflicht 854 ff
- Aktionäre 860 f
- Aufsichtsrat 844 ff
- Aufsichtsratswahl 846 ff
- Auskunftsrecht der Aktionäre 850 ff
- DCGK 844 ff
- Entbindung von der Verschwiegenheitspflicht 842
- Entlastung 851
- Entsprechenserklärung 844 ff
- Gesellschaftsinteresse 856 ff, 859 f
- Information des Mandanten 855 f
- Interessenkonflikte 852 ff
- konkrete Interessenkonflikte 852 f
- Mandanteninteressen 856 ff
- Mandate von Aktionären 860 f
- Nominierungsgremium 846 ff
- potenzielle Interessenkonflikte 853
- Tätigkeitsverbote 856 ff
- Verbot der Vertretung widerstreitender Interessen 858 f
- Verfolgung von Mandanteninteressen 856 ff
- Verschwiegenheitspflicht 840 ff
- Wahrung des Gesellschaftsinteresses 856 ff
- widerstreitende Interessen 858 f
- Wissenszurechnung 853 f

- Rechtsformneuschöpfungen** 65 ff
- Rechtsformvariationen** 65 ff
- Rechtsmissbrauch** 772 f
- Rechtsvergleich**
  - Delisting 694 ff
  - geschlossene Kapitalgesellschaft 53 ff
- Reform**
  - Ausfallhaftung 777
  - geschlossene Kapitalgesellschaft 59
  - GmbH 84 ff
  - Unternehmengesellschaft 88 ff, 103 ff
- reformatio in peius** 268 f
- Register**
  - Fonds 737
  - Gesellschaftsanteil 834 ff
- Repräsentationsmodell** 394 f
- Reputationsverlust** 871 f
- Ressortzuständigkeit** 210 f
- Risikomanagementsystem** 482 ff
  - Begriff 482 ff
  - Berichterstattung 486
  - Bewertung 485 f
  - Erfassung 485
  - Mittel 482 ff
  - Organisation 482 ff
  - Prüfungsausschuss 465 ff
  - Steuerung 487
  - Überwachung 488
  - Ziel 482 ff
- Rom-I-VO** 906 ff
- rufschädigende Handlungen** 871
- Sacheinlage** 106 ff
- Sanktionen**
  - Aufsichtspflichtverletzung 283 ff, 289 ff
  - Geschäftsleiter 201 ff
  - Kapitalmarktrecht 313
  - Unternehmensstrafe 120 f, 139 ff
- Schuldscheindarlehen**
  - Kapitalmarktunion 26 f
  - kleinere und mittlere Unternehmen 26 f
- Schutzgesetzhaftung**
  - Fonds 753 ff
  - Geschäftsleiter 206 f
- Schweiz** 368 ff
- SE** s Europäische Aktiengesellschaft
- Selbstorganisationsrecht** 469 f
- Selbstzweckpool**
  - Pooling von Kapitalgesellschaftsanteilen 590
- shareholder value** 875
- Sicherheiten für Gesellschafterdarlehen** 541 ff
  - anfänglich bestellte Sicherheiten 564 ff
  - Anfechtung 554 ff
  - Auszahlungssperre 561
  - Bargeschäft 565 f
  - eigenkapitalersetzende Darlehen 544 ff
  - MoMiG 544 ff, 548 ff
  - Nachrang 560 ff
  - ökonomische Rechtfertigung 542 f
  - Stehenlassen der Kreditlinie 545 ff
  - Vorsatzanfechtung 566 ff
- Sicherungszession** 164 ff
- Sitztheorie** 399
- Sockelverteidigung**
  - Organmitglieder im Strafverfahren 345 ff
  - Unternehmen im Strafverfahren 345 ff
- Sonderdelikt** 283
- Sonderinteresse des Vorstands** 887 ff
- Spezialfonds** 744 f
- Spill-over** 134 f
- Staatsversagen** 249 ff
- stakeholder value** 875
- Stehenlassen der Kreditlinie** 545 ff
- Stimmrecht**
  - Gesellschaftsanteil 800 ff, 823 ff
  - Juristische Person 791 f
  - Pooling von Kapitalgesellschaftsanteilen 591, 594 f
- Strafbarkeitsmodelle** 389 ff
- Strafprozess**
  - Organmitglieder im Strafverfahren 347 ff
  - Unternehmen im Strafverfahren 347 ff
  - Unternehmensstrafe 149 ff
- strafrechtliche Verantwortlichkeit von Unternehmen** 364 ff
  - Aufsichtspflichtverletzung (s dort)
  - Compliance 366 ff
  - Entscheidungsträger 377 ff
  - Geschäftsleiter (s dort)
  - Kartellbußgelder (s dort)
  - Liechtenstein 373 ff
  - Organmitglieder im Strafverfahren (s dort)
  - Österreich 368 ff
  - Rechtsfolgen 380 f
  - Regelungsmodell 375 ff
  - Schweiz 368 ff
  - sonstige Mitarbeiter 379 f
  - Unternehmen im Strafverfahren (s dort)
  - verbandsbezogene Zuwiderhandlungen 377 ff
  - Vermögensabschöpfung (s dort)
- Strafstatut** 391 ff
- Tätigkeitsverbote** 856 ff
- tatuntauglicher Dritter** 302 ff
- Teilnehmer**
  - Menschenrechtsverletzungen 431 f

- punitive damages für unternehmerische Menschenrechtsverletzungen 431 f

**Testamentsvollstreckung** 604 ff**Tochtergesellschaft** 260 f**Touch and Concern**

- Menschenrechtsverletzungen 420 ff
- punitive damages für unternehmerische Menschenrechtsverletzungen 420 ff

**Treuepflicht**

- geschlossene Kapitalgesellschaft 77 ff
- Gesellschaftsanteil 805 f, 827 f

**Typenzwang** 733 ff**Unterlassen**

- Organmitglieder im Strafverfahren 338 f
- Unternehmen im Strafverfahren 338 f

**Unternehmen im Strafverfahren** 336 ff

- Arrest 352 ff
- Aufsichtsrat 339 f
- außerstrafrechtliche Rechtsfolgen 356 f
- Beschlagnahme 349 ff
- Beschuldigter 336 ff
- Bruttonprinzip 353
- Bußgeld 359 f
- Einstellung 355 f
- faktisches Organ 337
- Freiheitsstrafe 354 f
- Garantenstellung 338 f
- Geldstrafe 354 f
- Geschäftsleiter 337
- Gewerbezentralregister 360
- Juristische Person 341
- Konfrontation 347 f
- konzertierte Verteidigung 345 ff
- Kooperation 347 f
- Korruptionsregister 360 f
- Organisationsstruktur 337 f
- Rechtsfolgen 354
- Sockelverteidigung 345 ff
- strafprozessuale Eingriffe 347 ff
- Unterlassen 338 f
- unternehmensinterne Untersuchungen 348 f
- Verbandsgeldbuße 341 f
- Verfallsrecht 341 f, 357 ff
- Vergaberegister 360 f
- Vermögenswerte 352 ff
- Verteidigung 342 ff
- Verteidigungsunterlagen 349 ff
- vorläufiger Zugriff 352 ff
- Wissenszurechnung (s dort)

**unternehmensinterne Untersuchungen**

- Organmitglieder im Strafverfahren 348 f
- Unternehmen im Strafverfahren 348 f

**Unternehmensreputation** 866 ff**Unternehmensstrafe** 112 ff

- Anteilseigner 133 ff
- Aufsichtspflichten 118 ff
- deliktisches Handeln von Organen 117 f
- effektive Rechtsdurchsetzung 148 ff
- Fiktionstheorie 124 f
- Funktion 147
- Individualstrafen 135 ff
- Mitarbeiterdelikte 141
- ökonomisches Präventionsmodell 132 ff
- Organisationspflichten 118 ff
- Präventionswirkung 131 ff
- Rechtsfolgen 120 f
- Sanktionen 120 f
- Sanktionslücke 139 ff
- Spill-over 134 f
- Steuerung von Unternehmen 132 ff
- Strafprozess 149 ff
- strikte Haftung 141 ff
- Verbandsstrafgesetzbuch 117 ff
- Verrichtungsgehilfe 129 f
- Verschuldenshaftung 141 ff
- Vertretertheorie 124 f
- Wissenszurechnung 384 ff
- zivilrechtliche Haftung 123, 127 ff

**Unternehmensvertrag**

- Aufhebung s Aufhebung eines Unternehmensvertrages
- Aufsichtspflichtverletzung 289 ff
- Kündigung 614 f
- Verjährung 616 f
- Verlustausgleichsanspruch 615 f
- Zinsen 616 f

**Unternehmergesellschaft**

- Abschaffung 97 ff
- Alternativen 101 ff
- Beschleunigung der Eintragung 106
- Beurkundungspflicht 109 f
- Eintragung 106
- geschlossene Kapitalgesellschaft 68 ff
- Mindestkapital 104 ff
- Rechtstatsachen 98 ff
- Reform 88 ff, 103 ff
- Sacheinlage 106 ff
- Übertragung der Geschäftsanteile 109 f

**unternehmerische Menschenrechtsverletzungen** s Menschenrechtsverletzungen**Untreue** 187 ff

- Ausdehnung 193 ff
- Gefährdungsschaden 197 ff
- Gesellschaftsvermögen 191 ff
- Interessen der Gesellschafter 191 ff
- Reichweite 193 ff

- Vermögensbetreuungspflicht 193 ff
- Vorverlagerung 197 ff
- Verbandsgeldbuße**
  - Organmitglieder im Strafverfahren 341 f
  - Unternehmen im Strafverfahren 341 f
- Verbandsstrafgesetzbuch** 117 ff
- Verbot der Fremdrechtsanwendung** 396 ff
- Verbot der Vertretung widerstreitender Interessen** 858 f
- Vereinigte Staaten von Amerika**
  - Delisting 694 f
  - geschlossene Kapitalgesellschaft 49 ff, 66 ff
  - Menschenrechtsverletzungen 416 f
  - punitive damages für unternehmerische Menschenrechtsverletzungen 416 f
- Vereinigtes Königreich**
  - Delisting 695
  - geschlossene Kapitalgesellschaft 42 ff
  - GmbH 88 ff
- Verfallsrecht**
  - Organmitglieder im Strafverfahren 341 f, 357 ff
  - Unternehmen im Strafverfahren 341 f, 357 ff
  - Vermögensabschöpfung 295
- Vergaberegister**
  - Organmitglieder im Strafverfahren 360 f
  - Unternehmen im Strafverfahren 360 f
- Vergleich** 632 ff
- Vergütung** 515 ff
- Verjährung** 616 f
- Verlustrückstellungsanspruch** 615 f
- Vermögensabschöpfung** 295 ff
  - abzuschöpfendes Etwas 299 ff
  - Drittempfängerverfall 297
  - Grundstruktur 295 f
  - Originalverfall 296
  - tatuntauglicher Dritter 302 ff
  - Verfallsrecht 295
  - Vertreterfälle 302
  - Wertersatzverfall 296
- Vermögensbetreuungspflicht** 193 ff
- Verrichtungsgehilfe** 129 f
- Verschwiegenheitspflicht**
  - Rechtsanwalt 840 ff
  - Wissenszurechnung 405 f
- Verteidigung**
  - Organmitglieder im Strafverfahren 342 ff, 349 ff
  - Unternehmen im Strafverfahren 342 ff, 349 ff
- Vertragsfreiheit** 74 f
- Vertragsgerichtsstand** 911 f
- Vertreterfälle** 302
- Vertretertheorie** 124 f
- Vertretung**
  - fehlerhafter Aufsichtsrat 512 f, 525 ff
  - Gesellschaftsanteil 804 f, 826 f
- Verzicht** 632 ff
- Völkerrecht**
  - Menschenrechtsverletzungen 430 ff
  - punitive damages für unternehmerische Menschenrechtsverletzungen 430 ff
- Vollstreckung**
  - Menschenrechtsverletzungen 436
  - punitive damages für unternehmerische Menschenrechtsverletzungen 436
- Vorerbschaft** 604 ff
- Vorgesellschaft** 793 ff
- Vorsatzanfechtung** 566 ff
- Vorsatzbegriffe** 393 ff
- Wachstumsmärkte** 30 ff
- Weitergabepool** 589 f
- Wertersatzverfall** 296
- Wettbewerb der Rechtsformen** 88 ff
- whistleblowing** 320 f
- Wissenszurechnung** 384 ff
  - ausländische Verschwiegenheitspflichten 407 ff
  - Auslandsbezug 387 ff
  - Auslandsgesellschaften 392 f
  - Datumtheorie 407 ff
  - EADS/Daimler 385 f
  - eigenständige Verbandsstrafbarkeit 390 f
  - Gesellschaftsstatut 396 ff
  - Grenzen 405 ff
  - Gründungstheorie 399
  - internationales Strafrecht 391 f
  - Kennenmüssen 404
  - Knowledge Governance 409 ff
  - Kollektivwissen 393 f
  - Konzept der Wissensorganisation 401 ff
  - lex minor 398
  - organakzessorische Unternehmensstrafbarkeit 389 f
  - Organtheorie 400 f
  - Porsche/Volkswagen 387
  - privates Wissen 407
  - Qualifikation 399
  - Rechtsanwalt 853 f
  - Repräsentationsmodell 394 f
  - Sitztheorie 399
  - Strafbarkeitsmodelle 389 ff
  - Strafstatut 391 ff
  - Unternehmensstrafverfahren 384 ff
  - Verbot der Fremdrechtsanwendung 396 ff
  - Verschwiegenheitspflicht 405 f

- Vorsatzbegriffe 393 ff
- Wissensabfrage 409 f
- Wissenserhebung 409 f
- Wissensorganisation 401 ff
- Wissensstatut 396 ff
- Wissensweiterleitung 409 f
- Zivilrechtsakzessorietät 395

**Zahlungsverbot** 153 ff

**Zinsen** 616 f

**Zivilrechtsakzessorietät** 395

**Zurechnung**

- Aufsichtspflichtverletzung 285
- Juristische Person 789

**Zusatzrendite** 879 f

**Zustellung**

- Menschenrechtsverletzungen 435 f
- punitive damages für unternehmerische Menschenrechtsverletzungen 435 f
